# Supplementary material for: Correlation Between Different Vertical Facial Patterns and Mandibular Incisor Alveolar Bone Loss in Patients with Skeletal Class III Malocclusion During Pre-Surgical Orthodontic Decompensation
Source: Research Square preprint supplement (doi:10.21203/rs.3.rs-6042123/v1), 2025-03-11
Supplement: Supplementary file 1 [file 5908146054fbaf8b7820b69a.docx]

| Variables (n = 95) | Mean | SD | Median |
| --- | --- | --- | --- |
| HME | 1.636 | 1.852 | 1.724 |
| VME | -0.229 | 1.578 | -0.068 |
| HMR | -0.478 | 1.196 | -0.397 |
| VMR | 1.384 | 1.481 | 1.241 |

Table S1. Morphology changes of mandibular incisor during POD.

HME, horizontal movement of incisal edge; VME, vertical movement of incisal edge; HMR, horizontal movement of root apex; VMR, vertical movement of root apex.
